# Supplementary material
Source: ML conference proceedings conference paper supplement (https://openreview.net/forum?id=eAPrmf2g8f2)
Supplement: supplementary_material [file attachment]

# Instructions on running the experiments

As the proposed BulletTrain method is applied to AugMix, TRADES, and MART, this repo heavily depends on the original implementation of AugMix, TRADES, and MART.

## AugMix experiments:

1. Please follow the instructions in <https://github.com/google-research/augmix> to install the dependencies and download the datasets
2. Run AugMix baseline:  

```
cd augmix/augmix-baseline  
python cifar10.py
```
3. Run AugMix with BulletTrain  

```
cd augmix/augmix-speedup  
python cifar10.py
```

## TRADES experiments:

1. Please follow the instructions in <https://github.com/yaodongyu/TRADES> to install the dependencies and download the datasets
2. Run TRADES baseline:
  - a. Training  

```
cd trades  
python train_trades_cifar10.py --model-dir trades_baseline
```
  - b. Evaluation  

```
python pgd_attack_cifar10.py --model-path  
trades_baseline/model-wideres-epoch76.pt
```
3. Run TRADES with BulletTrain:
  - a. Training  

```
cd trades  
python train_trades_cifar10_bullet.py --model-dir trades_bullet
```
  - b. Evaluation  

```
python pgd_attack_cifar10.py --model-path  
trades_bullet/model-wideres-epoch76.pt
```

## MART experiments:

4. Please follow the instructions in <https://github.com/YisenWang/MART> to install the dependencies and download the datasets
5. Run MART baseline:
  - a. Training  

```
cd mart  
python train_wideresnet.py --model-dir mart_baseline
```
  - b. Evaluation  

```
python eval_wideresnet.py --model mart_baseline --num-steps 20
```

6. Run MART with BulletTrain:

a. Training

```
cd mart
```

```
python train_wideresnet_bullet.py --model-dir mart_bullet
```

b. Evaluation

```
python eval_wideresnet.py --model mart_bullet --num-steps 20
```
